# Supplementary material for: Fatty acid metabolism-derived prognostic model for lung adenocarcinoma: unraveling the link to survival and immune response
Source: Frontiers journal article supplement (doi:10.3389/fimmu.2025.1507845), 2025-03-13
Supplement: Data_Sheet_2.zip [file Data_Sheet_2.zip]

## Sheet: Sheet1
	Actin	CCNB1	CCNA2	PBK	19.6481	CDK1	BUB1	MELK	CDC20	DLGAP5		Actin	CCNB1	CCNA2	PBK	TTK	CDK1	BUB1	MELK	CDC20	DLGAP5		Actin	CCNB1	CCNA2	PBK	TTK	CDK1	BUB1	MELK	CDC20	DLGAP5		Actin	CCNB1	CCNA2	PBK	TTK	CDK1	BUB1	MELK	CDC20	DLGAP5
B	12.6376	18.0168	19.3117	25.501	20.4981	18.6452	18.975		20.1999	20.2315	H	12.4821	17.0232	17.5499	24.2035	19.484	17.3036	17.4843		18.1815	18.9923	P	12.2478	17.1919	17.4299	24.6768	18.9082	16.7571	17.5585		17.2463	17.5543	A	12.1869	17.4157	18.9679	24.632	20.8557	17.3785	17.6405		19.0658	20.1547
	12.7139	18.0945	19.4735	25.6759	21.2082	18.7838	19.2947		20.241	20.5048		12.4949	17.1098	17.7068	24.8261	20.5583	17.4157	17.5437		18.6165	19.0267		12.2566	17.4108	17.5746	24.8227	19.0989	16.7694	17.9308		17.4821	18.1611		12.3434	17.4576	19.3051	25.4496	22.0051	17.7744	17.9995		19.1729	20.262
	12.7442	18.5399	19.6213	25.9646	21.7462	19.4868	19.3471		20.7594	21.2786		12.4995	17.4301	17.8472	25.0133	20.6174	18.0344	18.0017		18.6399	19.2192		12.3575	17.5344	17.6848	24.8621	19.242	16.7724	17.964		17.4824	18.5434		12.5035	17.7341	19.4981	25.6545	22.0381	18.0854	18.0728		19.4844	20.8413
	12.7484	18.7068	21.6526	26.0593	23.1837	19.7983	20.0029		20.9158	21.377		12.5848	17.9129	18.0723	25.1175	20.7885	18.3127	18.2467		19.0146	19.2737		12.433	17.545	17.6954	25.307	19.5892	16.9187	18.0365		17.9785	19.285		12.5384	17.9474	19.9539	25.7294	22.1327	18.2538	18.1478		19.5268	20.9261
	12.9804	19.0257	21.8536	26.104	24.7656	19.9145	20.1192		21.2537	21.5765		12.9356	18.2461	18.1822	25.4046	20.892	18.3782	18.3055		19.7607	19.3007		12.6098	17.8737	18.2405	26.2964	19.7194	17.2161	18.1181		20.9726	20.267		12.6252	18.1602	20.5348	26.1215	22.2018	18.6271	18.287		19.7826	21.3565
	13.0028	19.1181	22.9946	26.4242	25.5016	20.0438	20.8296		22.1764	23.1353		13.2234	18.6258	18.2701	26.0708	21.0179	18.5424	18.6439		20.1504	19.3161		12.7274	17.9669	18.2725	26.361	19.8511	17.3261	18.251		21.9059	20.776		12.6499	18.4859	20.8103	26.3502	22.3572	18.6696	18.7128		19.9484	21.5201
	13.0874	19.2332	23.4794	26.5345	26.0562	20.1047	21.1281		23.8358	23.5169		13.2586	18.6768	18.3443	26.2304	21.0538	18.5775	19.2679		20.4055	19.3868		12.8724	18.2445	18.2879	26.4451	20.0404	17.3774	18.3374		21.9269	20.9942		12.8682	18.6427	20.812	26.9366	22.4163	18.9343	18.8864		20.4986	21.7098
	13.1479	20.536	23.5954	28.7048	28.726	20.4742	21.1711		24.6604	23.6122		13.3282	18.7452	18.3586	26.2414	21.1855	18.9669	19.8727		20.6399	19.428		12.9772	18.3465	18.3277	26.8556	20.439	17.4467	18.3767		22.2755	21.5922		13.1455	18.6583	21.2676	27.16	22.4395	19.0021	19.0904		20.8484	21.9206
	13.1638	20.5529	23.9913	28.7363	29.9829	20.8718	21.4285		24.9815	24.0095		13.3285	18.8989	18.8664	26.2547	22.3395	18.9955	20.0368		20.6543	19.676		13.2119	18.4456	18.5532	27.1021	22.0481	17.756	18.68		22.3882	21.9884		13.269	18.7413	21.2911	27.3892	23.3479	19.0142	19.1194		21.0198	22.0709
